# Supplementary material for: Gelation Based on Host–Guest Interactions Induced by Multi-Functionalized Nanosheets
Source: MDPI journal article supplement (doi:10.3390/gels7030106), 2021-08-04
Supplement: s1 [file s1]

## Supplementary Materials

# Gelation Based on Host–guest Interactions Induced by Multi-functionalized Nanosheets

Hao Ding,<sup>1,2</sup> Sana T. Khan,<sup>2</sup> Jingjing Liu,<sup>1</sup> Luyi Sun<sup>1,2,3,\*</sup>

<sup>1</sup>Polymer Program, Institute of Materials Science, University of Connecticut, Storrs, Connecticut 06269, United States; hao.2.ding@uconn.edu (H.D.); jjl668@hotmail.com (J.L.)

<sup>2</sup>Department of Chemical and Biomolecular Engineering, University of Connecticut, Storrs, Connecticut 06269, United States; sana.t.khan@uconn.edu (S.K.)

<sup>3</sup>Department of Biomedical Engineering, University of Connecticut, Storrs, CT 06269, United States

\*Correspondence: [luyi.sun@uconn.edu](mailto:luyi.sun@uconn.edu)

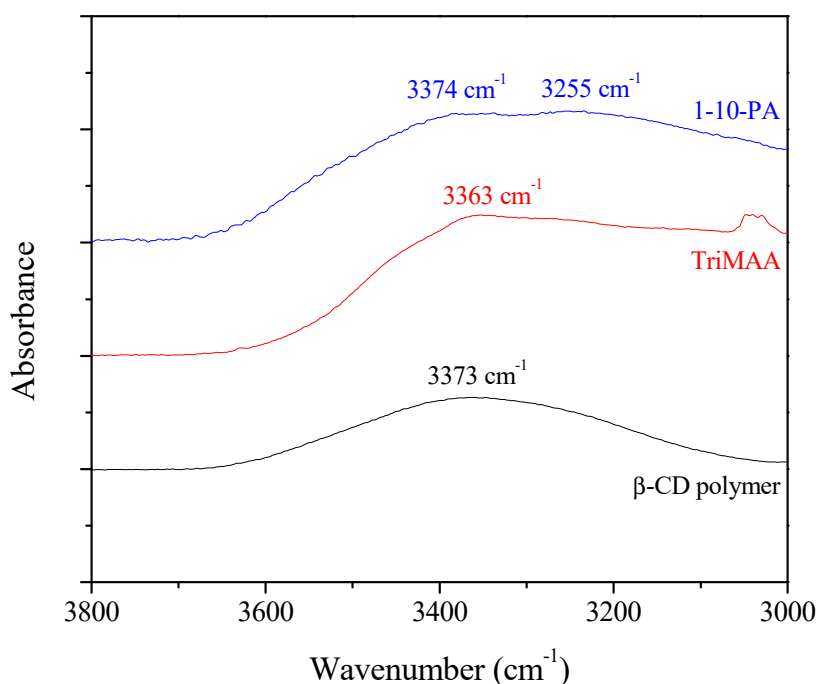

Figure S1. ATR-FTIR spectra of  $\beta$ -CD polymer, TriMAA, and 1-10-PA.

The peak position of -OH vibration can be used as an indication of the host–guest interaction through the hydrogen bond.[1] The wavenumber of -OH vibration in  $\beta$ -CD polymer and TriMAA are 3373 and 3363 cm<sup>-1</sup>, respectively. However, within the 1-10-PA gel, besides the peak at 3374 cm<sup>-1</sup>, another broad peak showed up at 3255 cm<sup>-1</sup>, which indicates the formation of aggregation compound.[2]

1. Zhou, C.; Cheng, X.; Zhao, Q.; Yan, Y.; Wang, J.; Huang, J. Self-assembly of nonionic surfactant tween 20@ 2 $\beta$ -CD inclusion complexes in dilute solution. *Langmuir* **2013**, *29*, 13175–13182.
2. Zhong, X.; Hu, C.; Yan, X.; Liu, X.; Zhu, D. Aggregate morphology transition of an adamantane-containing surfactant via the host–guest interaction with  $\beta$ -cyclodextrin. *Journal of Molecular Liquids* **2018**, *272*, 209–217.
